# Supplementary material for: Insights into interfacial mechanisms: CsPbBr3 nanocrystals as sustainable photocatalysts for primary amine oxidation
Source: Royal Society of Chemistry journal article supplement (doi:10.1039/d3cc05725a), 2024-01-01
Supplement: d3cc05725a1.pdf [file d3cc05725a1.pdf]

## Supporting Information

### **Insights into Interfacial Mechanisms: CsPbBr<sub>3</sub> Nanocrystals as Sustainable Photocatalysts for Primary Amine Oxidation**

Monika Ahlawat and Vishal Govind Rao\*

Department of Chemistry, Indian Institute of Technology Kanpur, Kanpur, 208016, Uttar Pradesh, India

#### **Corresponding Author**

\* Vishal Govind Rao, Department of Chemistry, Indian Institute of Technology Kanpur, Kanpur, 208016, UP, India; orcid.org/0000-0003-1205-3006; E-mail: [vgrao@iitk.ac.in](mailto:vgrao@iitk.ac.in)

## S1. Materials

Cesium carbonate ( $\text{Cs}_2\text{CO}_3$ , 99%), lead bromide ( $\text{PbBr}_2$ ,  $\geq 98\%$ ), octadecene (ODE, 90%), oleic acid (OAc, 90%) oleylamine (OAm, 70%), acetone (Thermofisher), benzylamine (Sigma Aldrich), 4-methoxy benzylamine (TCI),  $\text{CDCl}_3$  (Eurisotop), 1,3,5-trimethoxybenzene (Mesitylene, Sigma Aldrich), Proline (Avra) 5,5-Dimethyl-1-pyrroline N-oxide (DMPO,  $\geq 98.0\%$ ), Toluene (99.8%), 4-(methylthio)benzylamine (Sigma Aldrich).

Note: All the reagents were used as procured without any further purification.

## S2. Characterization

The absorption and steady-state photoluminescence (PL) spectra of  $\text{CsPbBr}_3$  NCs were acquired using a UV-Vis-NIR spectrophotometer (JASCO V770) and FluoroMax+, Horiba Scientific. Further, the structural characterization of  $\text{CsPbBr}_3$  NCs was carried out with transmission electron microscopy, TEM (FEI- Tecnai G<sup>2</sup> 12 Twin TEM 120 kV). The size distribution and lattice *d*-spacing were estimated using ImageJ software. All one and two-dimensional Nuclear magnetic resonance (NMR) measurements were performed on the JEOL ECZ-500 MHz NMR instrument. <sup>1</sup>H spectrum was acquired with a spectral width set to 10 ppm and a relaxation delay time of 2 s. The mixing time for the 2D Nuclear Overhauser Effect Spectroscopy (NOESY) spectrum was set to 300 ms with a spectral width of 10 ppm. Powder X-ray diffraction pattern (PXRD) study was performed on PANalytical X'Pert by PANalytical. Electron paramagnetic resonance (EPR) spectra were acquired from Bruker's EMX EPR spectrometer. Gas chromatography-mass spectrometry (GC-MS) was performed on Agilent 8890 GC and 5977B GC/MSD systems. Fourier-transformed infrared spectrum (FTIR) was acquired using BRUKER ALPHA-II (ECO-ATR mode). Elemental analysis of  $\text{CsPbBr}_3$  NCs was done through X-ray photoelectron spectroscopy (XPS) on PHI 5000 Versaprobe-II, FEI Inc., Japan, equipped with a monochromatic Al K $\alpha$  (1486.6 eV) radiation source. We performed the photocatalytic reactions using a visible range Fibre-Coupled Illuminator, OSL2 from ThorLabs.

## S3. Synthesis of $\text{CsPbBr}_3$ NCs

$\text{CsPbBr}_3$  NCs were synthesized following an earlier report with slight modifications.<sup>1</sup> Firstly, we prepared Cs-oleate by adding 40.7 mg of  $\text{Cs}_2\text{CO}_3$  to 2 mL ODE in a 50 ml 3-neck RB flask, followed by 125  $\mu\text{L}$  of OA. The above mixture was then heated to 120 °C for 1 h under  $\text{N}_2$  purging. The temperature was then increased to 150 °C until the  $\text{Cs}_2\text{CO}_3$  was completely

dissolved to form a clear yellow-brown Cs-oleate solution. In another RB flask, 138 mg of PbBr<sub>2</sub> was added to 10 mL ODE heated at 100 °C. 1 mL of OAm and OAc each was further added to the mixture and the temperature increased to 120 °C for ~ 1 h with N<sub>2</sub> purging. The mixture was allowed to heat while stirring until the PbBr<sub>2</sub> completely dissolved to form a clear solution. The temperature was further increased to 160 °C with continuous N<sub>2</sub> purging. The as-prepared Cs-oleate solution (0.8 m) was quickly injected into the reaction mixture, and the reaction was immediately quenched in an ice water bath. The crude solution was then precipitated using acetone as an anti-solvent and centrifuged at 12000 rpm. The supernatant was discarded, and the pellet was redispersed in toluene. The solution was again centrifuged at 4000 rpm, and the supernatant was stored for further use.

**S4. Estimation of Concentration of CsPbBr<sub>3</sub> NCs:** The concentration of CsPbBr<sub>3</sub> NCs was calculated using intrinsic and molar absorption coefficients, as reported earlier.<sup>2,3</sup> The following equation was used to derive molar extinction coefficient ( $\epsilon$ ) of CsPbBr<sub>3</sub> NCs in terms of intrinsic absorption coefficient ( $\mu_i$ ).

$$\epsilon = \frac{N_a V_{NC}}{\ln 10} \mu_i \quad (1)$$

Where,  $N_a$  = Avogadro constant

$V_{NC}$  = NC volume (as extracted from TEM data analysis)

$$\mu_i \text{ (at 335 nm)} = 1.98 \times 10^5 \text{ cm}^{-1}$$

Further, we applied Beer Lambert's law (at 335 nm absorption wavelength) to estimate the concentration (Molar) of CsPbBr<sub>3</sub> NCs

$$A_{335} = \epsilon_{335} CL \quad (2)$$

$A_{335}$  = absorbance of CsPbBr<sub>3</sub> NCs dispersion at 335 nm

$L$  = optical path length (1cm), and

$C$  is the concentration to be calculated.

## S5. Spectroscopic characterization of CsPbBr<sub>3</sub> NCs

In the absorbance and steady-state PL spectrum, the colloidal solution of CsPbBr<sub>3</sub> NCs in toluene displayed a prominent excitonic feature at 507 nm. Examination of the TEM image (inset of Figure S1a) revealed that the NCs possessed an approximate size of 12 nm. The PXRD spectrum unveiled the cubic phase crystal structure of CsPbBr<sub>3</sub> NCs (Figure S1b). Significantly, we verified the existence of OAm and OAc as a ligand shell on the NC's surface NMR spectroscopic analysis (Figure S1c), which contributes to the colloidal stability of the CsPbBr<sub>3</sub> NCs.

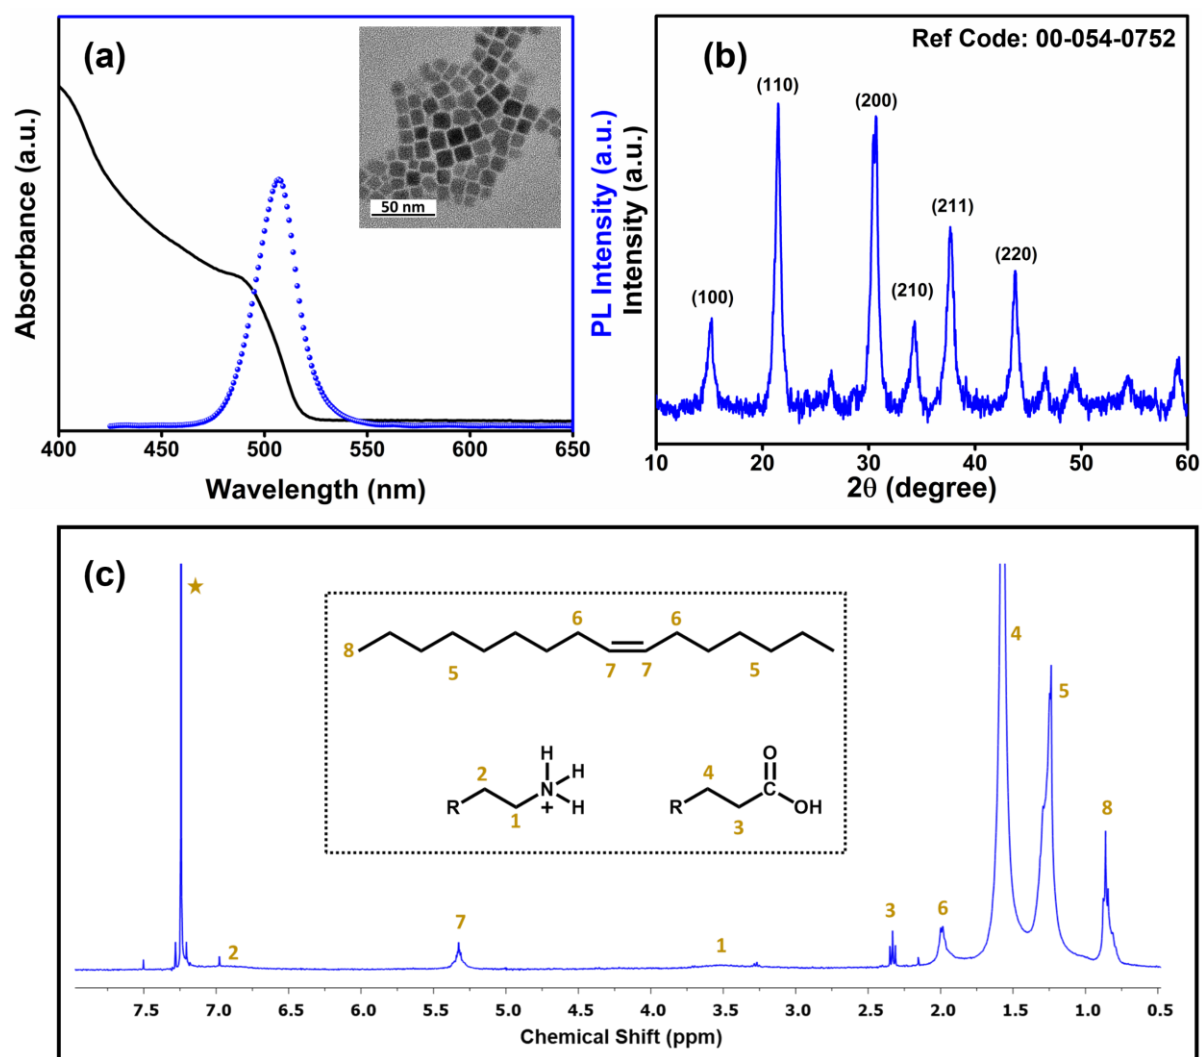

**Figure S1.** (a) Absorbance and PL spectrum of the colloidal solution containing CsPbBr<sub>3</sub> NCs in toluene. Inset: TEM image of CsPbBr<sub>3</sub> NCs. (b) PXRD spectrum of CsPbBr<sub>3</sub> NCs. (c) <sup>1</sup>H NMR spectrum of CsPbBr<sub>3</sub> NCs acquired in CDCl<sub>3</sub>. The chemical shift values are indexed with their corresponding protons in OAm and OAc.

## S6. Photocatalytic conversion of benzylamine to N-benzylidenebenzylamine

The catalytic reaction was carried out in a 2 ml reaction vessel. A benzylamine solution (60  $\mu$ L, 1M) was added to a colloidal solution of CsPbBr<sub>3</sub> NCs ( $\sim$  6  $\mu$ M, 0.4 mL) in toluene. The reaction vessel was filled with O<sub>2</sub> and pressure was maintained using O<sub>2</sub> balloon. The reaction mixture was allowed to stir for 10 min to equilibrate over the catalyst surface. Later, the reaction mixture was exposed to visible light for 10 h with constant stirring (keeping the outside temperature 25  $^{\circ}$ C). The intensity of light falling on reaction vessel was measured to be  $\sim$  450 mWcm<sup>-2</sup> (except for the light intensity dependence control experiments). After completion of the reaction the crude solution was dried under vacuum and the product yield was determined by <sup>1</sup>H NMR spectroscopic technique using mesitylene (1,3,5-trimethoxybenzene) as internal standard. All the NMR measurements were performed in CDCl<sub>3</sub> solvent. For the GC-MS analysis, the dried crude reaction mixture was separated with the addition of ethyl-acetate (acting as antisolvent).

## S7. <sup>1</sup>H NMR analysis of standard photocatalytic reaction and other control experiments

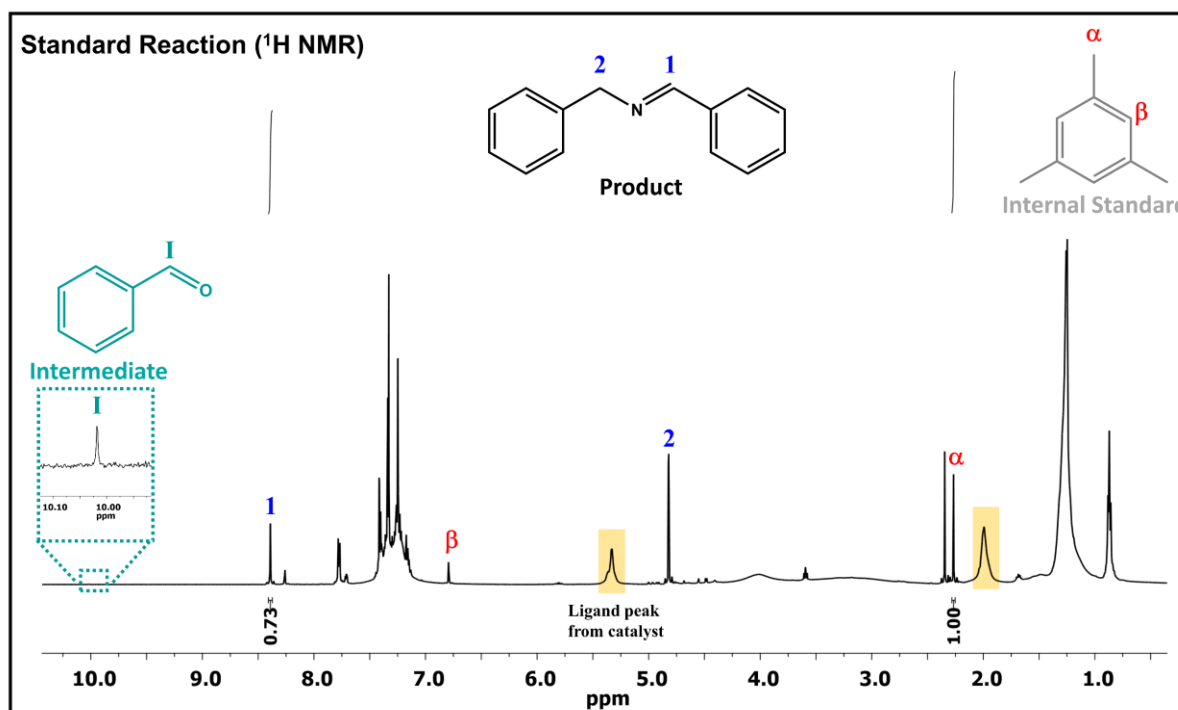

**Figure S2.** <sup>1</sup>H NMR analysis of the standard reaction (crude) in CDCl<sub>3</sub>. Mesitylene was used as internal standard for quantification of product. Aldehydic proton (I) highlight the formation of benzaldehyde in the reaction mixture which has been considered as an intermediate for imine formation reaction.

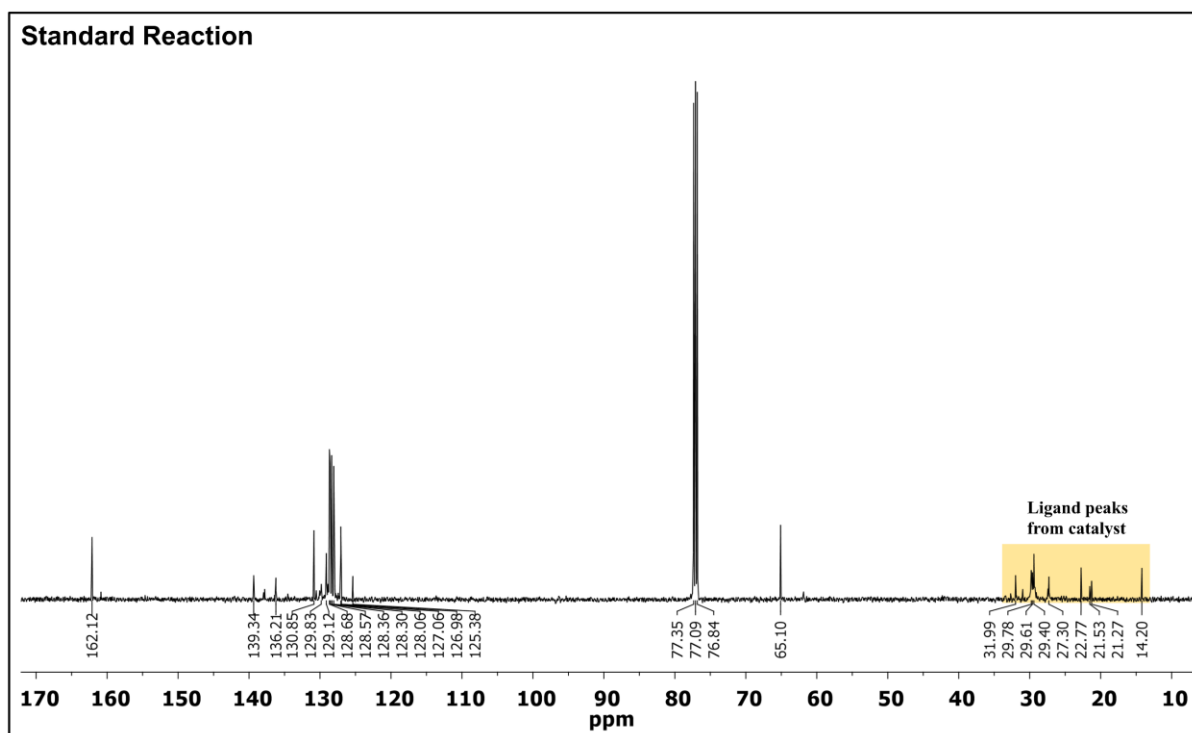

**Figure S3.**  $^{13}\text{C}$  NMR spectrum of standard reaction mixture (crude) in  $\text{CDCl}_3$ .

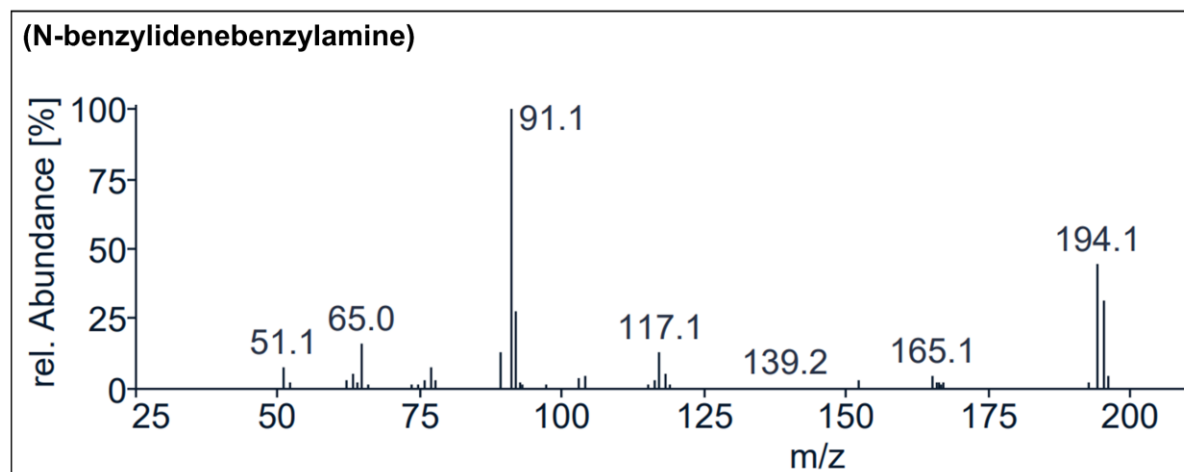

**Figure S4.** Mass spectrum of the product, N-benzylidenebenzylamine obtained from GC-MS analysis.

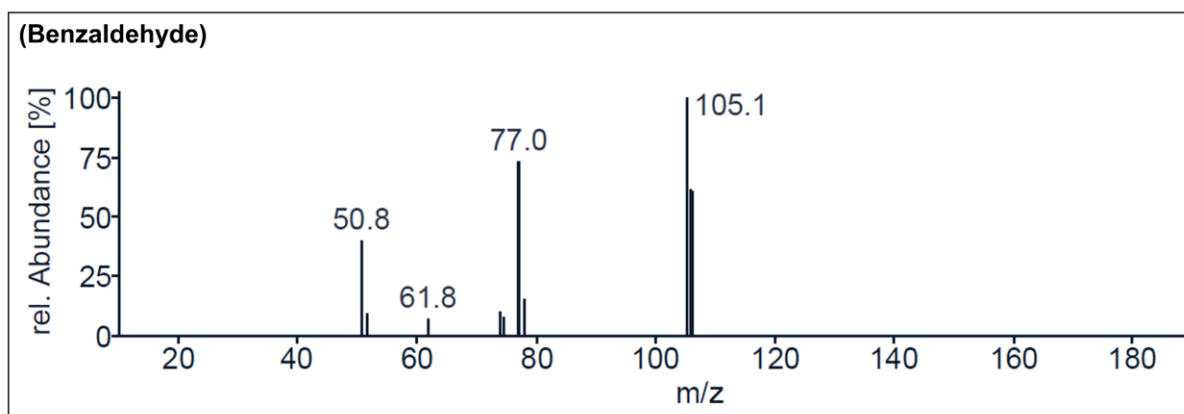

**Figure S5.** Mass spectrum of the intermediate (benzaldehyde) obtained from GC-MS analysis.

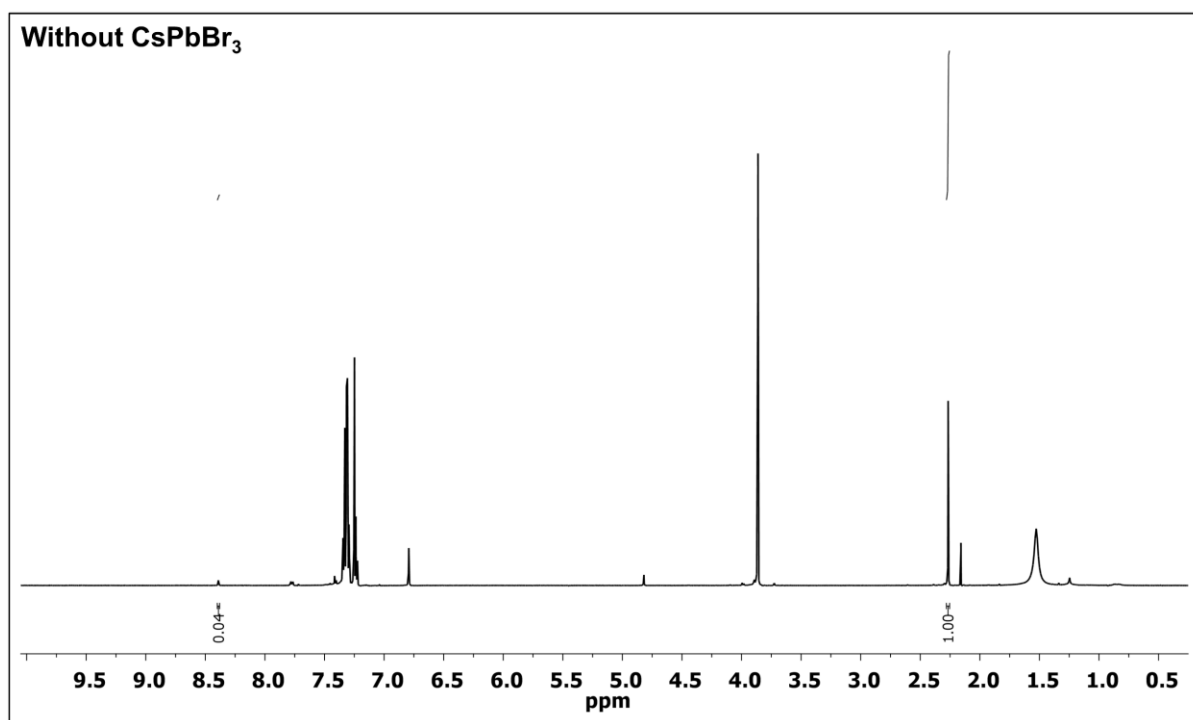

**Figure S6.**  $^1\text{H}$  NMR spectrum of control experiment performed in absence CsPbBr<sub>3</sub> NCs (pure toluene was used as solvent) keeping the other reaction conditions unchanged.

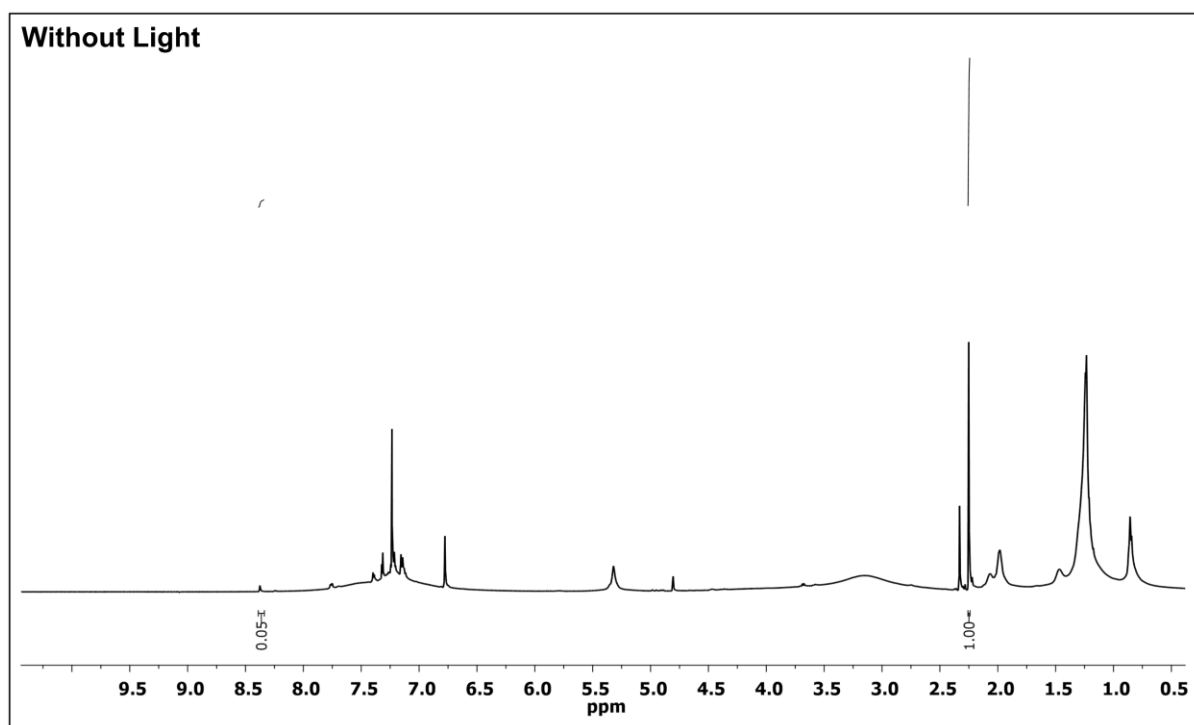

**Figure S7.** <sup>1</sup>H NMR spectrum of control experiment performed in absence of light irradiation keeping the other reaction conditions unchanged.

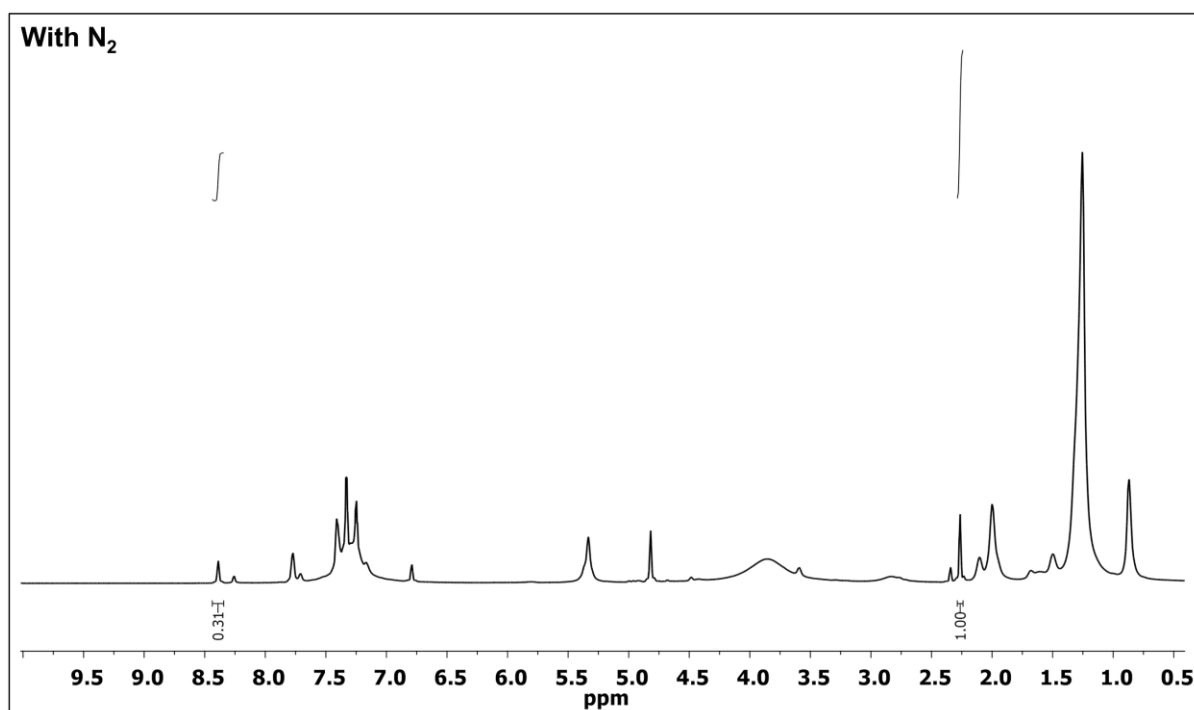

**Figure S8.** <sup>1</sup>H NMR spectrum of control experiment performed in absence of O<sub>2</sub> (maintaining N<sub>2</sub> pressure in the reaction vessel using balloon) keeping the other reaction conditions unchanged.



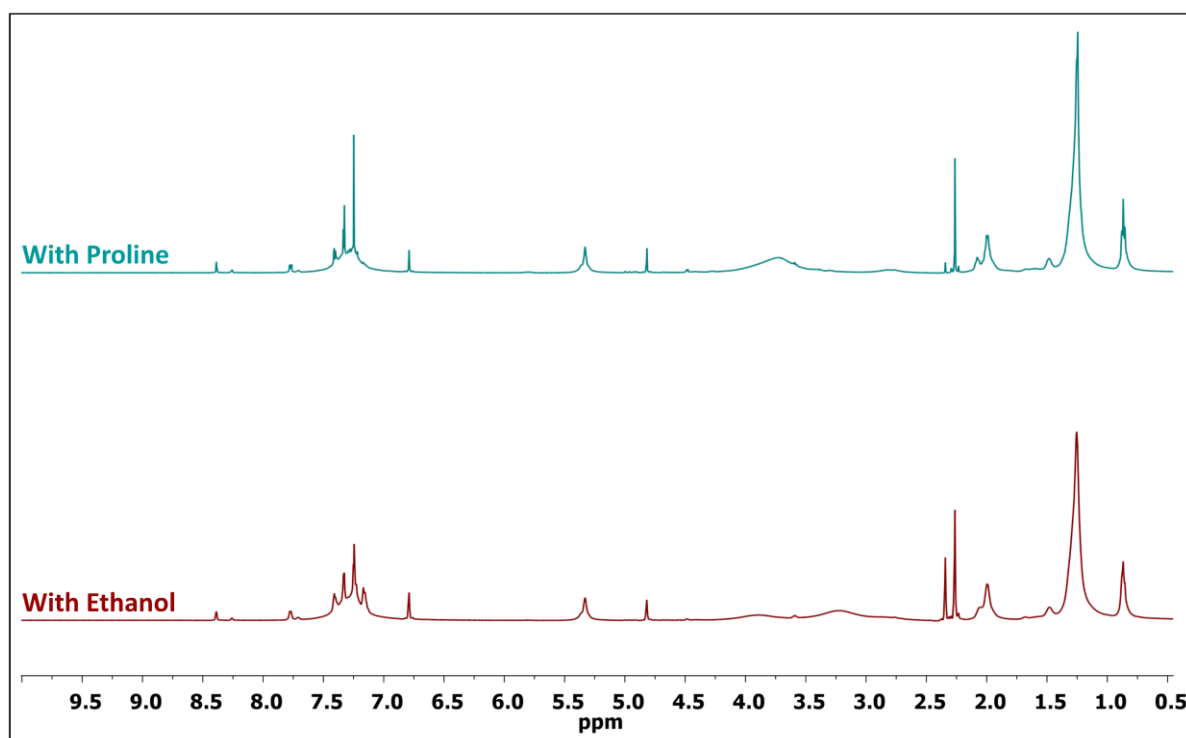

**Figure S9.**  $^1\text{H}$  NMR spectrum of control experiment performed in presence of ethanol (hole scavenger and proline ( $\text{O}_2^{\bullet-}$  scavenger) keeping the other reaction conditions unchanged.

#### S8. Time-dependent Product Yield of Photocatalytic Reaction

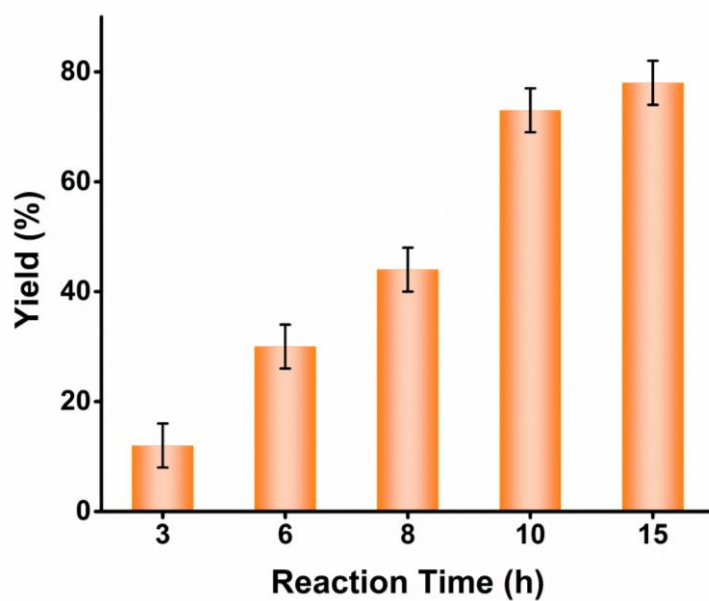

**Figure S10.** Time dependent yield of the standard reaction keeping the other reaction conditions constant.

### S9. EPR study

To the standard reaction mixture i.e., a colloidal solution of CsPbBr<sub>3</sub> NCs (~ 6  $\mu$ M, 0.4 mL) and benzylamine (60  $\mu$ L, 1M) in toluene, DMPO ( $3 \times 10^{-6}$  moles) was added and mixed properly. The as prepared reaction mixture was irradiated with visible light for 1 h and transferred to the EPR tube immediately. Further, the reaction mixture was then immediately frozen under liquid N<sub>2</sub> and the spectrum was acquired at 120 K.

### S10. Substrate scope and reactant interaction study of photocatalytic oxidative reaction

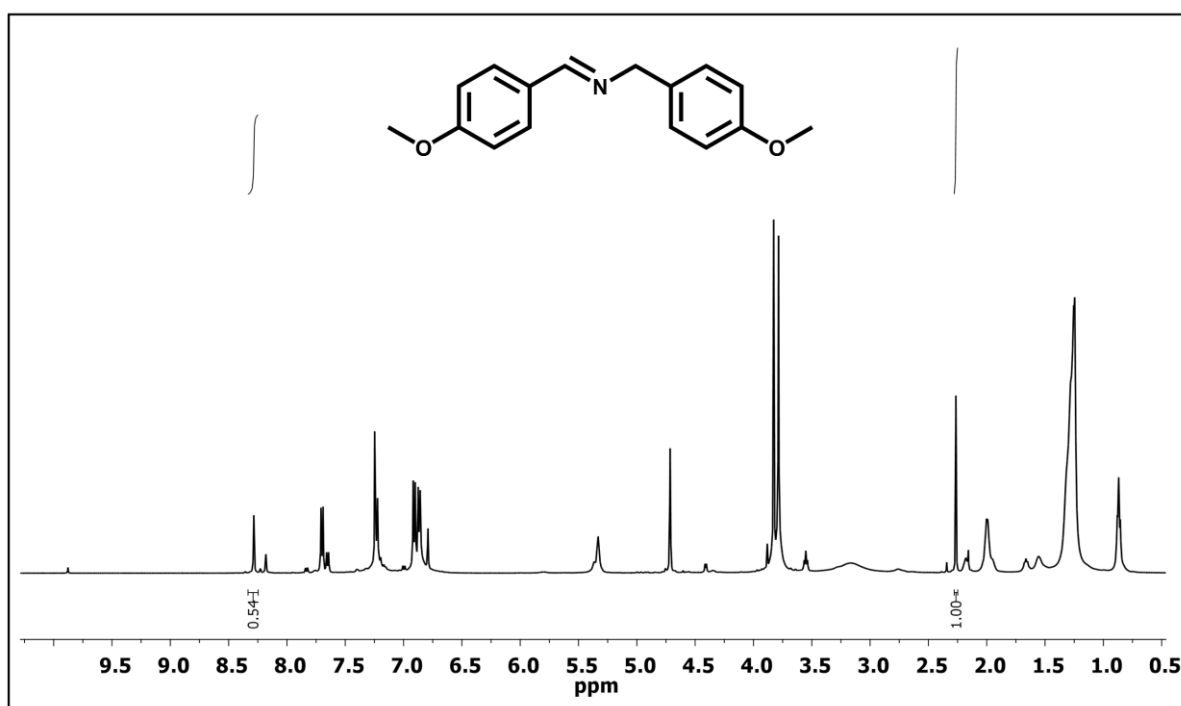

**Figure S11.** <sup>1</sup>H spectrum of N-(4-methoxybenzylidene)-1-(4-methoxyphenyl)methanamine) obtained as a product from coupling of 4-methoxybenzylamine under optimized reaction conditions of standard photocatalytic reaction.

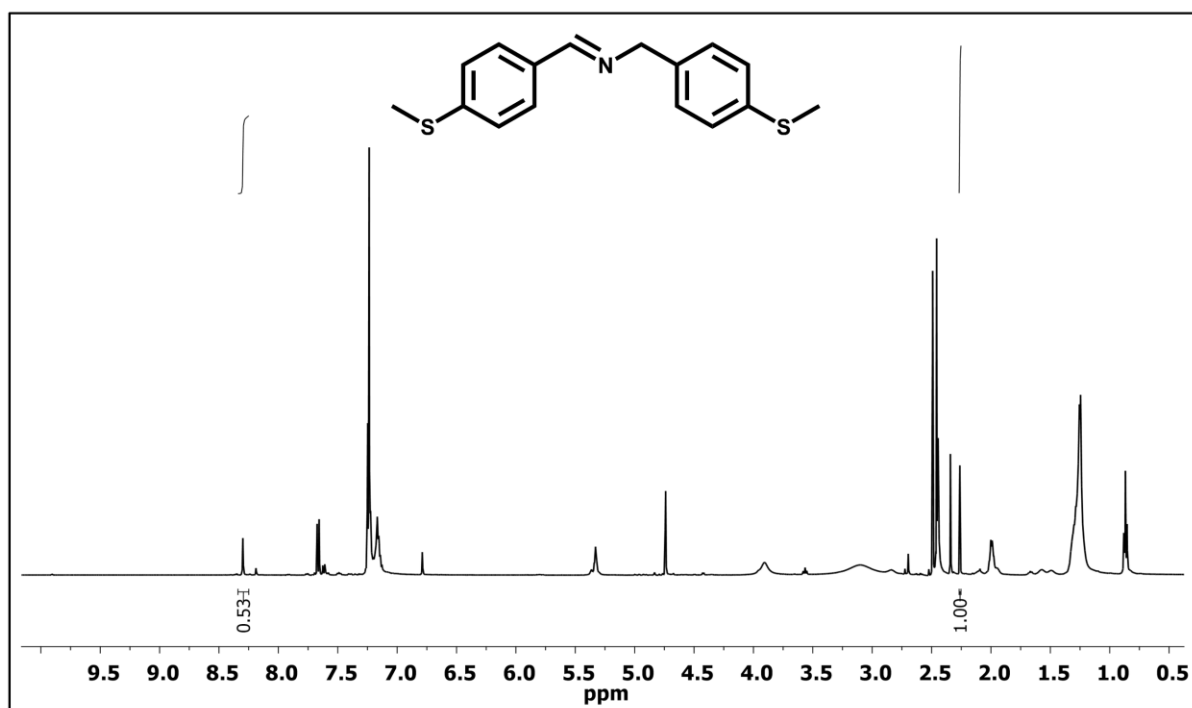

**Figure S12.** <sup>1</sup>H spectrum of N-(4-(methylthio)benzyl)-1-(4-(methylthio)phenyl)methanimine obtained as a product from coupling of 4-(methylthio) benzylamine under optimized reaction conditions of standard photocatalytic reaction. **Note:** We want to mention that we have observed a fraction of product as impurity in the procured 4-(methylthio) benzylamine from Sigma Aldrich. After taking the impurity into account we have observed 38% photocatalytic reaction yield in case of 4-(methylthio) benzylamine (which is mentioned in the main text). Whereas the photocatalytic reaction yield in case of standard benzylamine as a substrate is 69% considering (without CsPbBr<sub>3</sub> NCs) reaction conditions yield i.e., 4 %.

**Table S1.** Reaction yield obtained for the different substrates.

| 1 | Benzylamine               | 73 |
|---|---------------------------|----|
| 2 | 4-methoxybenzylamine      | 54 |
| 3 | 4-(methylthio)benzylamine | 38 |

### S11. Spectroscopic analysis of interactions between CsPbBr<sub>3</sub> NCs and reactant molecules (benzylamine and its derivatives)

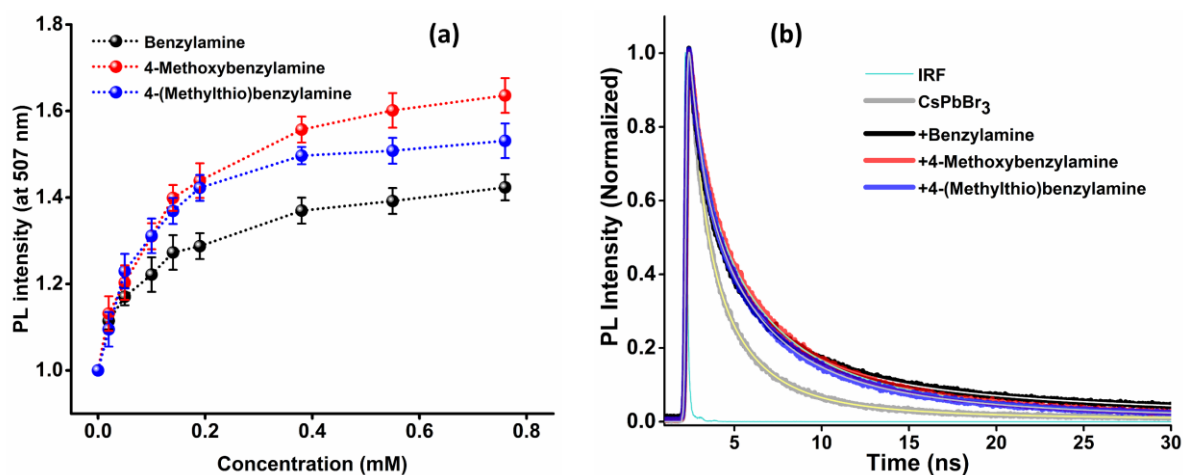

**Figure S13.** (a) PL intensity (at 507 nm) of CsPbBr<sub>3</sub> NCs (22 nM) versus concentration plot for all three different substrates showing the passivation effect (b) Comparative PL lifetime decay of CsPbBr<sub>3</sub> NCs in the absence and presence of benzylamine (0.8 mM) and its derivatives ( $\lambda_{\text{exc}} = 371$  nm).

**Table S2.** Parameters corresponding to PL lifetime decay, fitted to triexponential decay function.

| Sample                      | $a_1$ | $\tau_1$ (ns) | $a_2$ | $\tau_2$ (ns) | $a_3$ | $\tau_3$ (ns) | $\langle\tau\rangle$ (ns) |
|-----------------------------|-------|---------------|-------|---------------|-------|---------------|---------------------------|
| CsPbBr <sub>3</sub>         | 0.44  | 0.70          | 0.48  | 2.32          | 0.08  | 8.23          | 2.08                      |
| + Benzylamine               | 0.43  | 0.71          | 0.43  | 3.41          | 0.15  | 14.31         | 3.92                      |
| + 4-Methoxy benzylamine     | 0.31  | 0.78          | 0.46  | 3.09          | 0.23  | 9.24          | 3.79                      |
| +4-(Methylthio) benzylamine | 0.32  | 0.65          | 0.46  | 2.77          | 0.22  | 8.64          | 3.38                      |

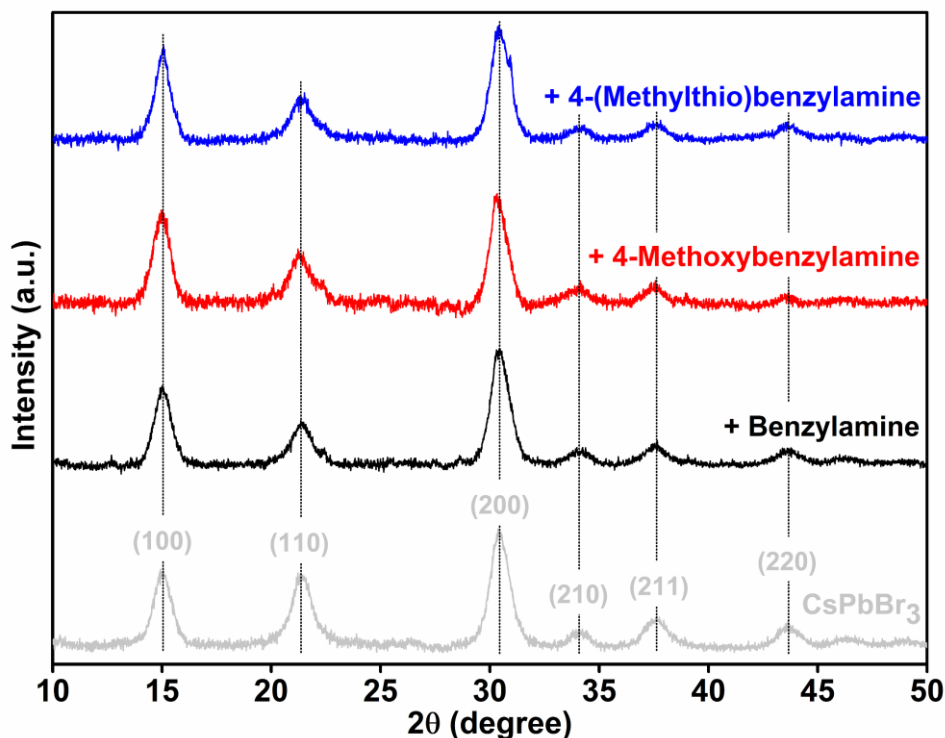

**Figure S14.** PXRD spectrum of CsPbBr<sub>3</sub> NCs before and after treatment with benzylamine, as well as its –OMe and –SMe derivatives, reveals no significant crystallographic changes attributable to different reactant molecules.

#### FTIR and XPS analysis.

The peaks corresponding to (i) aliphatic H-C= stretch at 917 cm<sup>-1</sup> and 970 cm<sup>-1</sup>, (ii) COO<sup>-</sup> stretch at 1403 cm<sup>-1</sup> and 1529 cm<sup>-1</sup>, (iii) NH<sub>3</sub><sup>+</sup> stretch around 3140 cm<sup>-1</sup> remain consistent in all the FTIR experiments, indicating the presence of OAm and OAc as the ligand shell for the CsPbBr<sub>3</sub> NCs. On the other hand, additional peaks, such as the HNC-H bend (1496 cm<sup>-1</sup>), C-O stretch (1248 cm<sup>-1</sup>), and –S–CH<sub>3</sub> stretch (642 cm<sup>-1</sup>), were observed for CsPbBr<sub>3</sub> NCs treated with benzylamine and its –OMe and –SMe derivatives, respectively. These features clearly indicate the presence of reactant molecules on the NC surface. However, they do not completely replace the native ligands.

Further, we carried out XPS measurements for CsPbBr<sub>3</sub> NCs with and without the addition of amine reactants. Intriguingly, we observed a significant shift towards higher binding energy (0.1–0.3 eV) and increased broadness of Cs (3d), Pb (4f), and Br (3d) signature peaks on the addition of benzylamine and its derivative reactant molecules, which can be attributed to the

interaction of these molecules with the CsPbBr<sub>3</sub> NC's surface.<sup>4</sup> Figure S15 represents the comparative FTIR and XPS analysis of the CsPbBr<sub>3</sub> NCs.

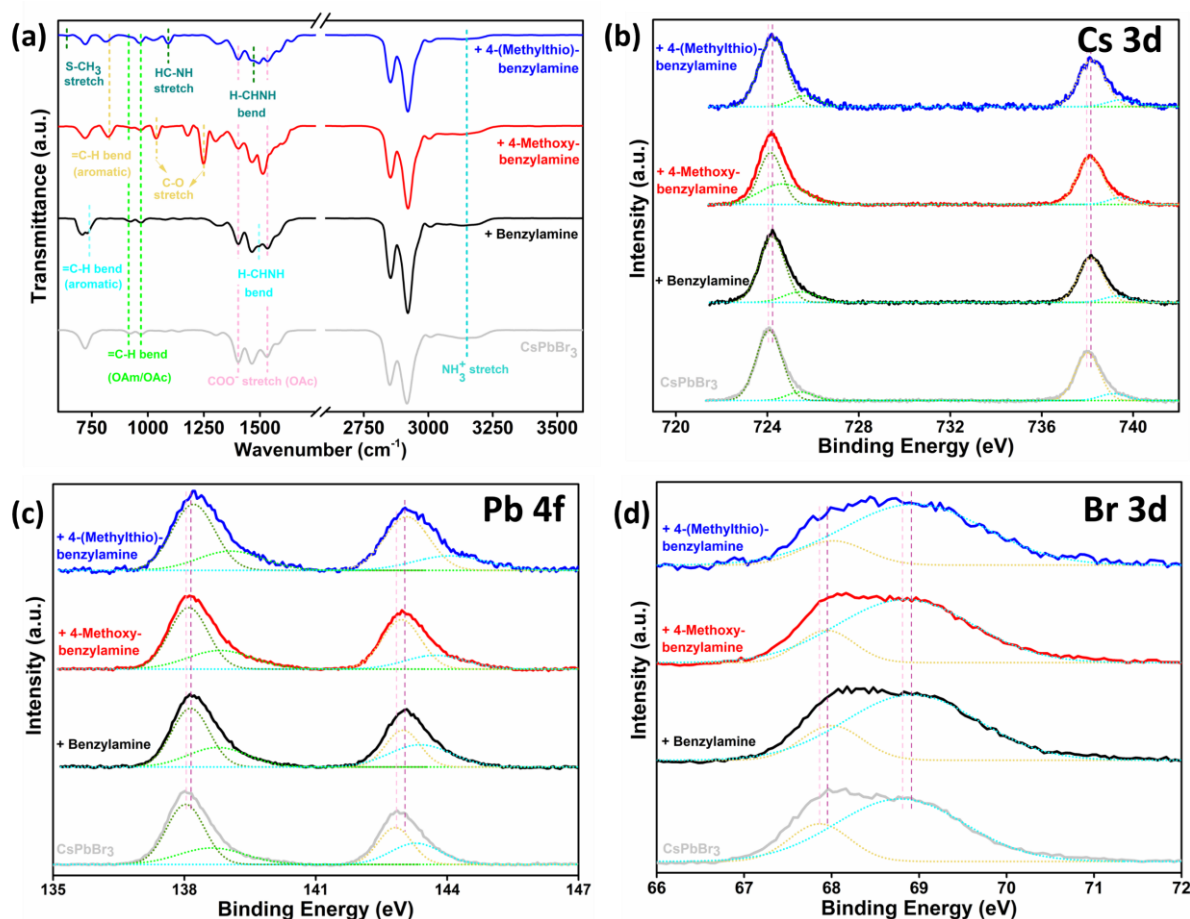

**Figure S15.** Spectroscopic characterization of CsPbBr<sub>3</sub> NCs with amine reactants. (a) FTIR spectrum of CsPbBr<sub>3</sub> NCs with and without amine reactant molecules. Deconvoluted high resolution XPS spectrum of (b) Cs 3d (c) Pb 4f, and (d) Br 3d elements obtained from CsPbBr<sub>3</sub> NCs with and without reactant molecules. Vertical lines highlight the shift in the binding energy on treatment with amine reactant molecules.

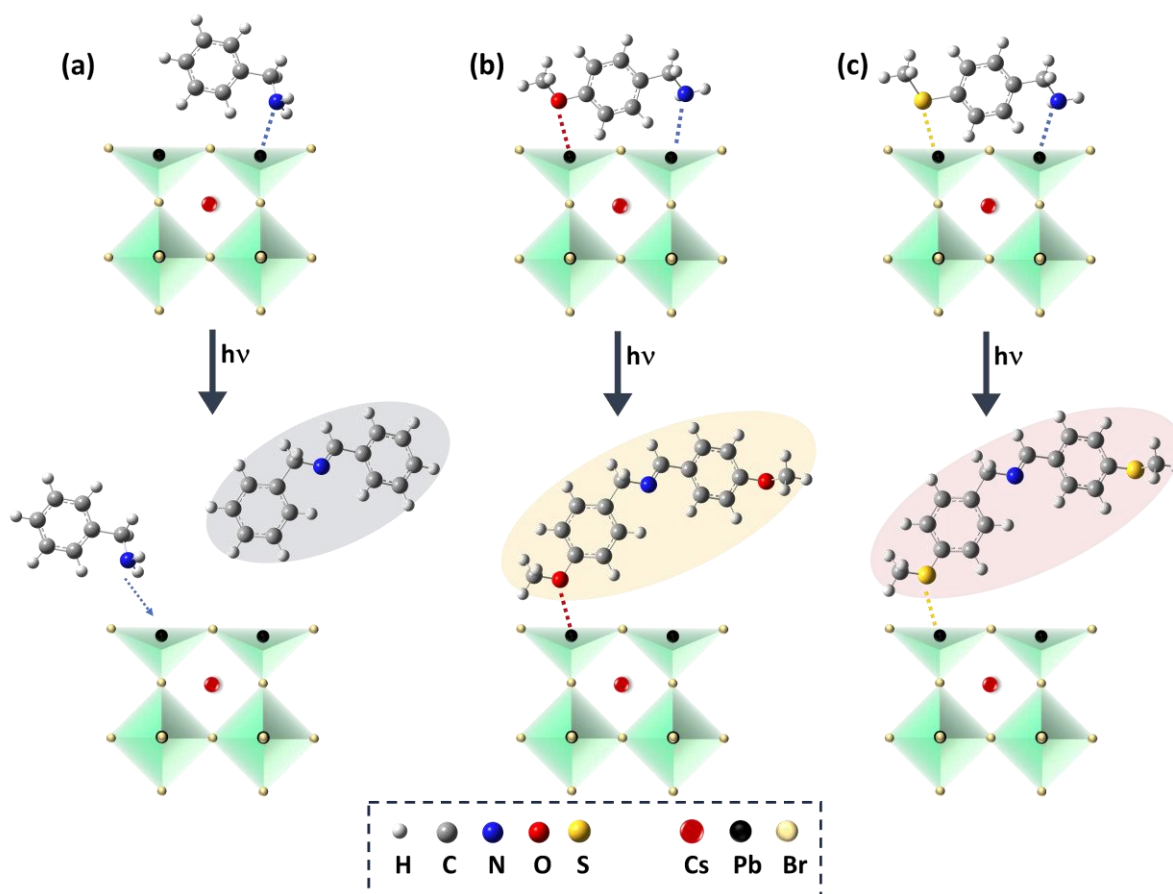

**Scheme S1.** Schematic showing the plausible interactions between different reactants and CsPbBr<sub>3</sub> NC's surface before and after completion of oxidation reaction.

## S12. Stability of Catalyst After Photocatalytic Experiments

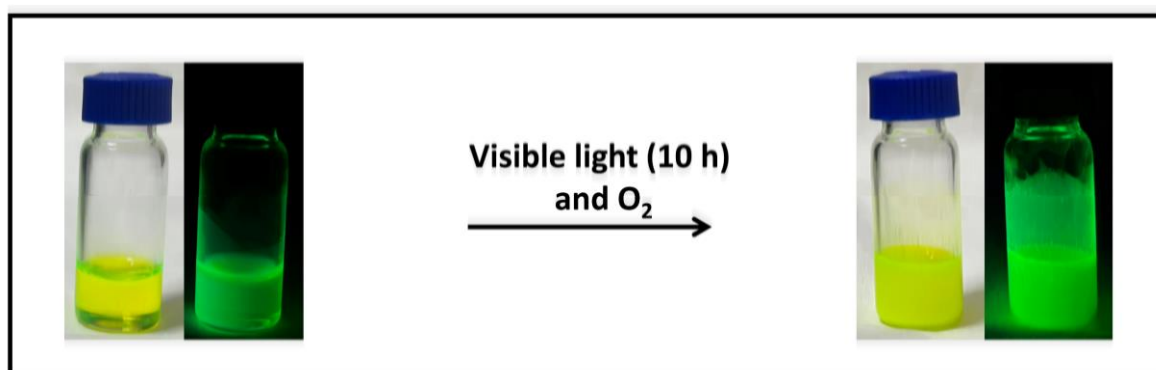

**Figure S16.** Photographic image of reaction mixture at 0 h and 10 h of visible light exposure in presence of oxygen.

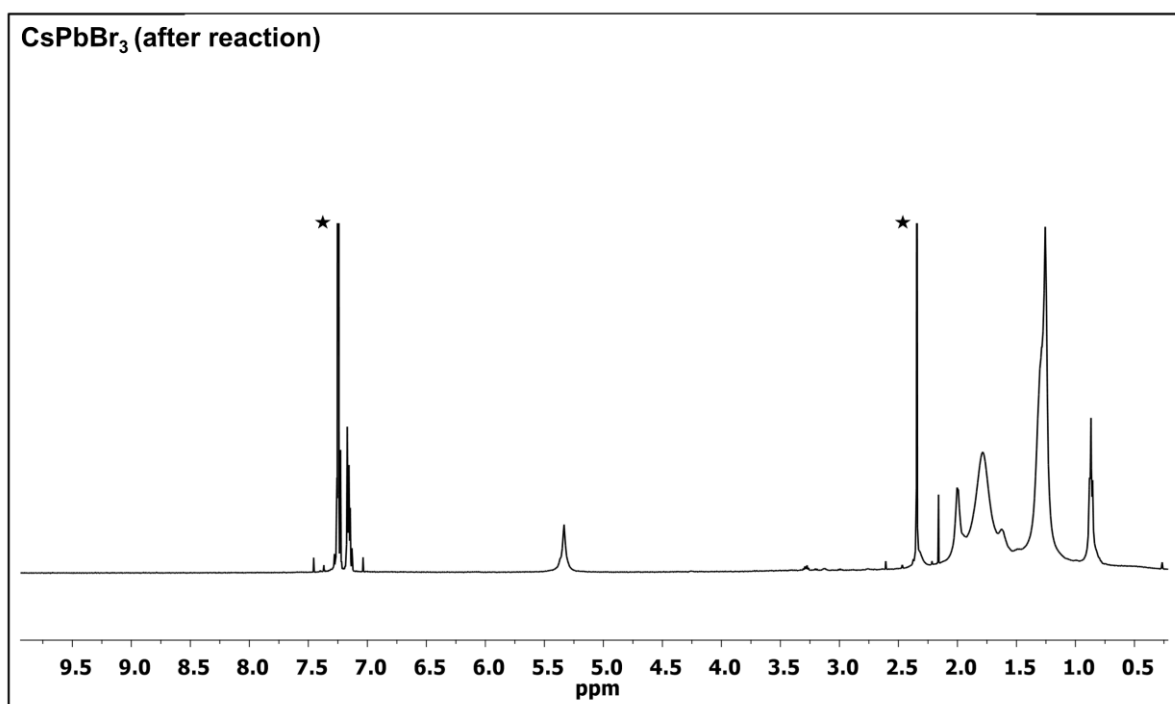

**Figure S17.**  $^1\text{H}$  NMR spectrum of  $\text{CsPbBr}_3$  NCs in  $\text{CDCl}_3$  after performing the standard reaction.

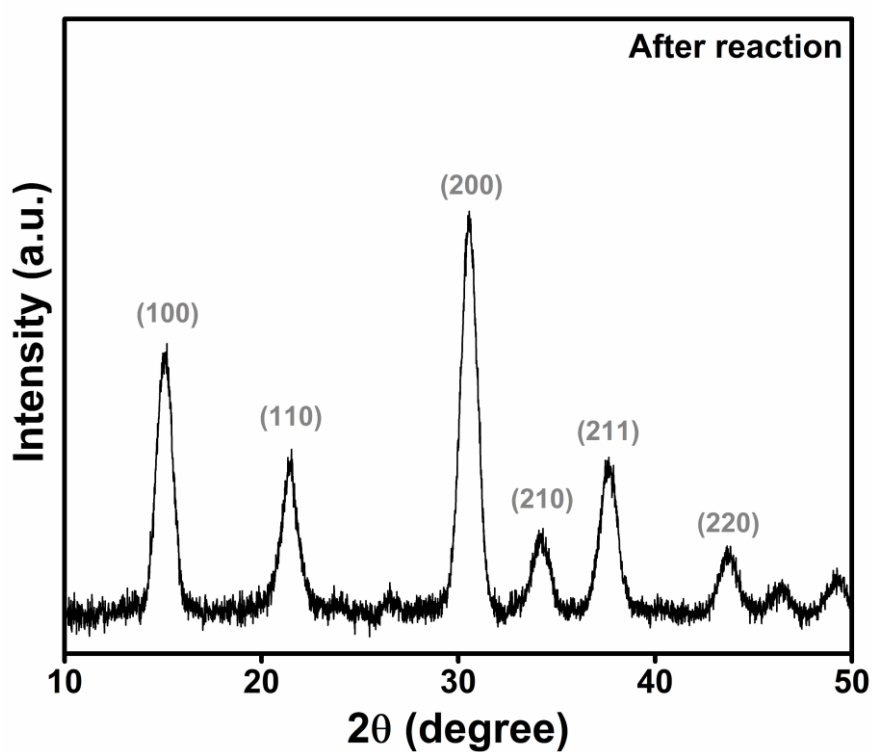

**Figure S18.** PXRD pattern of  $\text{CsPbBr}_3$  NCs after undergoing the standard benzylamine oxidation reaction, demonstrating their structural and crystallographic stability throughout the reaction.



## Recyclability of CsPbBr<sub>3</sub> NCs

After completion of the reaction, the CsPbBr<sub>3</sub> NCs were recovered via centrifugation (12000 rpm) using toluene acetone (1:1) mixture with the addition of 10  $\mu$ L OAm and OAc each to maintain their stability. The NCs were washed twice and redispersed in toluene for further use.

## References

- 1 L. Protesescu, S. Yakunin, M. I. Bodnarchuk, F. Krieg, R. Caputo, C. H. Hendon, R. X. Yang, A. Walsh and M. V. Kovalenko, *Nano Lett.*, 2015, **15**, 3692–3696.
- 2 J. De Roo, M. Ibáñez, P. Geiregat, G. Nedelcu, W. Walravens, J. Maes, J. C. Martins, I. Van Driessche, M. V. Kovalenko and Z. Hens, *ACS Nano*, 2016, **10**, 2071–2081.
- 3 J. Chakkamalayath, G. V. Hartland and P. V. Kamat, *J. Phys. Chem. C*, 2021, **125**, 17881–17889.
- 4 N. Fiuza-Maneiro, K. Sun, I. López-Fernández, S. Gómez-Graña, P. Müller-Buschbaum and L. Polavarapu, *ACS Energy Lett.*, 2023, **8**, 1152–1191.
